# Supplementary material
Source: Research Square preprint supplement (doi:10.21203/rs.3.rs-9483119/v1)
Supplement: Supplementary file 1 [file 55541fcf5b19607a81f9946a.docx]

| Supporting document 1. Comparison between groups of the EMG amplitude symmetry between sides during the CCFT in each pair of muscles. | | | | | |
| --- | --- | --- | --- | --- | --- |
| CCFT SCM  (Muscle symmetry) | **Controls (n=30)** | **CM (n=35)** | **CTTH (n=30)** | **CCH (n=34)** | **Statistic;** *ⴄ2****(effect size)*** |
| **Median (Range)** | **Median (Range)** | **Median (Range)** | **Median (Range)** |
| 22 mmHg (%) | 76.08 (68.12 – 90.12) | 67.33 (49.87 – 85.69) | 66.94 (53.00 – 86.49) | 65.53 (43.71 – 76.47) | H(3)= 7.83; (0.04) |
| 24 mmHg (%) | 76.36 (65.22 – 86.17) | 59.32 (48.54 – 84.11) | 77.56 (59.63 – 87.76) | 61.08 (42.11 – 84.21) | H(3)=5.83; (0.02) |
| 26 mmHg (%) | 71.96 (53.78 – 88.88) | 57.79 (50.77 – 87.96) | 67.98 (44.34 – 85.70) | 59.33 (42.31 – 90.39) | H(3)=1.18; (0.02) |
| 28 mmHg (%) | 77.24 (58.30 – 86.89) | 59.92 (49.56 – 78.68) | 67.08 (34.93 – 75.66) | 60.56 (37.66 – 76.60) | H(3)=5.79; (0.02) |
| 30 mmHg (%) | 73.86 (59.97 – 84.53) | 64.07 (53.31 – 76.79) | 56.02 (34.83 – 78.23) | 63.56 (49.19 – 84.41) | H(3)=3.68; (0.01) |
| CCFT ESM  (Muscle symmetry) | **Median (Range)** | **Median (Range)** | **Median (Range)** | **Median (Range)** | **Statistic** *ⴄ2* ***(effect size)*** |
| 22 mmHg (%) | 77.43 (62.65 – 84.06) | 62.26 (39.44 – 84.75) | 52.10 (42.29 – 81.29) | 59.97 (36.90 – 81.05) | H(3)=6.79; (0.03) |
| 24 mmHg (%) | 69.24 (55.92 – 84.98) | 59.74 (35.72 – 77.79) | 65.88 (46.63 – 81.12) | 54.86 (30.10 – 80.25) | H(3)=5.04; (0.02) |
| 26 mmHg (%) | 75.98 (53.80 – 86.92) | 62.23 (39.46 – 86.43) | 63.49 (43.83 – 84.84) | 51.09 (38.60 – 80.29) | H(3)=3.65; (0.01) |
| 28 mmHg (%) | 71.46 (60.97 – 87.52) | 57.66 (42.86 – 82.52) | 54.09 (34.72 – 79.71) | 55.14 (33.41 – 78.11) | H(3)=4.65; (0.01) |
| 30 mmHg (%) | 72.84 (55.77 – 86.87) | 66.46 (38.41 – 86.39) | 56.54 (46.45 – 86.36) | 60.11 (34.76 – 78.11) | H(3)=2.32; (0.01) |
| Legend. (CTTH) Chronic tension-type headache; (CM) Chronic Migraine; (CCH) Chronic cluster headache; (CCFT) craniocervical flexion test; (SCM) Sternocleidomastoid muscle; (ESM) Erectors Spinae Muscles; (22 mmHg) first stage of the test; (24 mmHg) second stage of the test; (26 mmHg) third stage of the test; (28 mmHg) fourth stage of the test; (30 mmHg) fifth stage of the test; (*r*) effect size; (*) p value< 0.05. | | | | | |

| **Supporting document 2.** Multiple linear regression analysis for NDI and headache frequency in each group of headache participants. | | | | | | | | | | | | |
| --- | --- | --- | --- | --- | --- | --- | --- | --- | --- | --- | --- | --- |
|  | | **Regression Coefficient (B)** | **Standardized Coefficient (β)** | **P-value** | **VIF** | **Overall Model** | | | **Analysis of Residuals** | | | |
| **Adjusted *R2*** | ***F*** | | ***Durbin Watson*** | ***Shapiro- Wilk*** | | ***D*** |
| ***DEPENDENT VARIABLE: NDI*** | | | | | | | | | | | | |
| **CM** | **PREDICTOR VARIABLE** |  |  |  |  | 0.17 | | 5.19 | 1.63 | 0.13 | | 0.6 |
| Total neck AROM | -0.79 | -0.46 | 0.03* | 1.00 |  | |  |  | | | |
| **EXCLUDED VARIABLES** |  |  |  |  |  | |  |  | | | |
|  | 28 mmHg ESM (%RMS) |  | 0.04 | 0.86 | 1.13 |  | |  |  | | | |
|  | 24 mmHg ESM (Symmetry) |  | 0.14 | 0.65 | 1.03 |  | |  |  | | | |
| **CTTH** | **PREDICTOR VARIABLE** |  |  |  |  | 0.12 | | 5.78 | 1.63 | 0.67 | | 0.02 |
| Total neck AROM | -0.80 | -0.386 | 0.02* | 1.00 |  | |  |  | | | |
|  | **EXCLUDED VARIABLES** |  |  |  |  |  | |  |  | | | |
|  | None |  | n.a. | n.a. | n.a. |  | |  |  | | | |
| **CCH** | **PREDICTOR VARIABLE** |  |  |  |  | n.a. | | n.a. | n.a. | n.a. | | n.a. |
|  | None | n.a. | n.a. | n.a. | n.a. |  | |  |  | | | |
|  | **EXCLUDED VARIABLES** |  |  |  |  |  | |  |  | | | |
|  | None |  | n.a. | n.a. | n.a. |  | |  |  | | | |
| ***DEPENDENT VARIABLE: FREQUENCY*** | | | | | | | | | | | | |
| **CM** | **PREDICTOR VARIABLE** |  |  |  |  | 0.11 | | 5.39 | 1.27 | 0.14 | | 0.03 |
|  | Retraction | 1.58 | 0.38 | 0.03* | 1.00 |  | |  |  | | | |
|  | **EXCLUDED VARIABLES** |  |  |  |  |  | |  |  | | | |
|  | None | n.a | n.a | n.a | n.a |  | |  |  | | | |
| **CTTH** | **PREDICTOR VARIABLE** |  |  |  |  | n.a | | n.a | n.a | n.a | | n.a |
|  | None | n.a | n.a | n.a | n.a |  | |  |  | | | |
|  | **EXCLUDED VARIABLES** |  |  |  |  |  | |  |  | | | |
|  | FHP | n.a | n.a | n.a | n.a |  | |  |  | | | |
|  | Total AROM | n.a | n.a | n.a | n.a |  | |  |  | | | |
| **CCH** | **PREDICTOR VARIABLE** |  |  |  |  | 0.25 | | 7.02 | 2.29 | 0.66 | | 0.5 |
|  | 26 mmHg ESM (%RMS) | -0.65 | -0.54 | 0.02* | 1.00 |  | |  |  | | | |
|  | **EXCLUDED VARIABLES** |  |  |  |  |  | |  |  | | | |
|  | 24 mmHg SCM (Symmetry) |  | 0.20 | 0.40 | 1.20 |  | |  |  | | | |
| ***DEPENDENT VARIABLE: HEADACHE IMPACT*** | | | | | | | | | | | | |
| **CM** | **PREDICTOR VARIABLE** |  |  |  |  | 0.30 | | 8.75 | 1.99 | 0.19 | | 0.06 |
|  | 28 mmHg (SCM Symmetry) | -0.21 | -0.58 | 0.009* | 1.00 |  | |  |  |  | |  |
|  | **EXCLUDED VARIABLES** |  |  |  |  |  | |  |  |  | |  |
|  | None | n.a. | n.a. | n.a. | n.a. |  | |  |  |  | |  |
| **CTTH** | **PREDICTOR VARIABLE** |  |  |  |  | n.a | | n.a | n.a | n.a | | n.a |
|  | None | n.a | n.a | n.a | n.a |  | |  |  | | | |
|  | **EXCLUDED VARIABLES** |  |  |  |  |  | |  |  | | | |
|  | 30 mmHg ESM (Symmetry) |  | 0.18 | 0.42 | 1.00 |  | |  |  | | | |
| **CCH** | **PREDICTOR VARIABLE** |  |  |  |  | 0.19 | | 6.47 | 1.81 | | 0.36 | 0.46 |
|  | 26 mmHg SCM (Symmetry) | -0.17 | -0.49 | 0.019* | 1.00 |  | |  |  |  | |  |
|  | **EXCLUDED VARIABLES** |  |  |  |  |  | |  |  |  | |  |
|  | 24 mmHg SCM (Symmetry) |  |  |  |  |  | |  |  | | | |
| **Abbreviations**: (NDI) Neck disability; (ESM) Erectors spinae muscle; (SCM) Sternocleidomastoid muscles; (AROM) Active  range of motion; (FHP) forward head posture; (mmHg) millimetre of mercury related to the CCFT stage; (PAIVMs) Passive  accessory intervertebral movements; (n.a) none applicable; (%RMS) Normalised Root Mean Square (VIF) Variance inflation  factor; (*) p<0.05. | | | | | | | | | | | | |
